# Supplementary material for: Sudden Changes and Their Associations with Quality of Life during COVID-19 Lockdown: A Cross-Sectional Study in the French-Speaking Part of Switzerland
Source: MDPI journal article supplement (doi:10.3390/ijerph18094888), 2021-05-04
Supplement: s1 [file s1]

# Sudden changes and their associations with quality of life during a COVID-19 lockdown: a cross-sectional study in the French speaking part of Switzerland

Manon Duay, Margot Morgiève and Hélène Niculita-Hirzel

Supplementary materials:

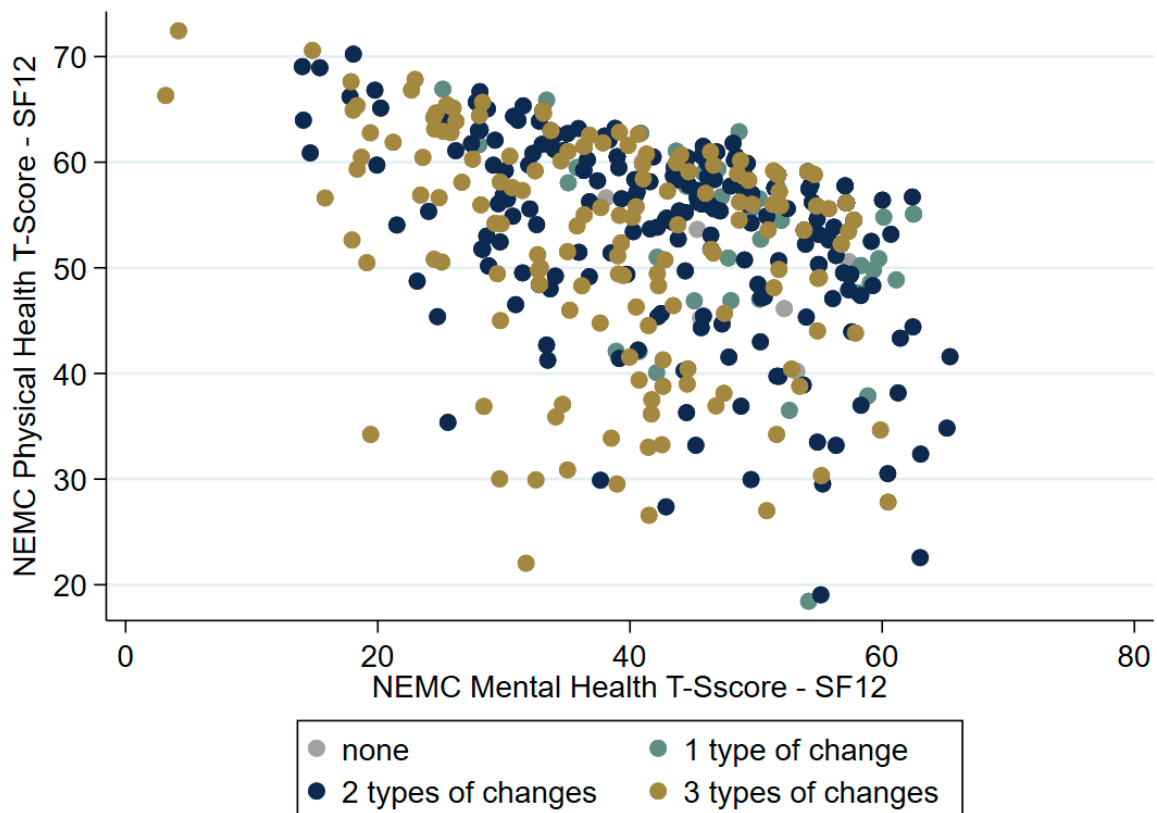

**Figure S1.** Physical and mental HRQoL score of participants coloured differently depending on the number of types of changes experienced.

**Table S1.** Content of the questions included in the Risk Perception of COVID-19 instrument and incidence of the responses in the studied population.

|                                                                                   |        |
|-----------------------------------------------------------------------------------|--------|
| <b>C1. What do you think the Covid-19 is?</b>                                     |        |
| an infectious disease that can affect everyone                                    | 92.34% |
| an infectious disease that affects only frail or elderly people                   | 6.03%  |
| a flu                                                                             | 0.93%  |
| none of it                                                                        | 0.70%  |
| <b>C2.How serious do you think the COVID-19 is?</b>                               |        |
| very serious                                                                      | 16.47% |
| serious                                                                           | 53.13% |
| slightly serious                                                                  | 26.68% |
| not serious                                                                       | 3.25%  |
| not at all serious                                                                | 0.46%  |
| <b>C3.In your opinion, should Covid-19...</b>                                     |        |
| be avoided                                                                        | 89.33% |
| not be avoided                                                                    | 10.67% |
| <b>C4.Do you think you can contract COVID-19 in the coming months if you</b>      |        |
| most certainly                                                                    | 18.33% |
| probably yes                                                                      | 39.44% |
| perhaps not - perhaps yes                                                         | 35.27% |
| probably not                                                                      | 3.02%  |
| certainly not                                                                     | 3.94%  |
| <b>C5. How concerned are you about contracting the COVID-19?</b>                  |        |
| very concerned                                                                    | 7.19%  |
| concerned                                                                         | 19.72% |
| slightly concerned                                                                | 41.07% |
| not concerned                                                                     | 22.04% |
| not at all concerned                                                              | 9.98%  |
| <b>Do you think the measures taken by the authorities during lockdown are ...</b> |        |
| <b>C6...necessary?</b>                                                            |        |
| most certainly                                                                    | 63.57% |
| probably yes                                                                      | 25.06% |
| perhaps not - perhaps yes                                                         | 7.42%  |
| probably not                                                                      | 2.09%  |
| certainly not                                                                     | 1.86%  |
| <b>C7... helping to prevent the spread of the infection?</b>                      |        |
| most certainly                                                                    | 67.05% |
| probably yes                                                                      | 23.67% |
| perhaps not - perhaps yes                                                         | 6.03%  |
| probably not                                                                      | 2.32%  |
| certainly not                                                                     | 0.93%  |
| <b>C8... being respected by the general population?</b>                           |        |
| never                                                                             | 0%     |
| not quite                                                                         | 16.24% |
| occasionally                                                                      | 11.60% |
| often                                                                             | 71.23% |
| always                                                                            | 0.93%  |
| <b>C9. Are you able to carry out the imposed measures?</b>                        |        |
| never                                                                             | 0.46%  |
| not quite                                                                         | 1.16%  |
| occasionally                                                                      | 1.62%  |
| often                                                                             | 43.16% |
| always                                                                            | 53.60% |
